# Supplementary material for: Improving Physical Activity among Residents of Affordable Housing: Is Active Design Enough?
Source: MDPI journal article supplement (doi:10.3390/ijerph16010151), 2019-01-08
Supplement: s1 [file s1]

Table S2. Global Physical Activity Questionnaire.

| Physical Activity, Continued                                                                                                                                                                                                                                                                                                                     |                                                                 |              |
|--------------------------------------------------------------------------------------------------------------------------------------------------------------------------------------------------------------------------------------------------------------------------------------------------------------------------------------------------|-----------------------------------------------------------------|--------------|
| Question                                                                                                                                                                                                                                                                                                                                         | Response                                                        | Code         |
| <b>Recreational activities</b>                                                                                                                                                                                                                                                                                                                   |                                                                 |              |
| The next questions exclude the work and transport activities that you have already mentioned.<br>Now I would like to ask you about sports, fitness and recreational activities (leisure), <i>[insert relevant terms]</i> .                                                                                                                       |                                                                 |              |
| Do you do any vigorous-intensity sports, fitness or recreational (leisure) activities that cause large increases in breathing or heart rate like <i>[running or football]</i> for at least 10 minutes continuously?<br><i>[INSERT EXAMPLES] (USE SHOWCARD)</i>                                                                                   | Yes 1<br><br>No 2 <i>If No, go to P13</i>                       | P10          |
| In a typical week, on how many days do you do vigorous-intensity sports, fitness or recreational (leisure) activities?                                                                                                                                                                                                                           | Number of days<br>_____                                         | P11          |
| How much time do you spend doing vigorous-intensity sports, fitness or recreational activities on a typical day?                                                                                                                                                                                                                                 | Hours : minutes    _____ : _____<br>hrs                    mins | P12<br>(a-b) |
| Do you do any moderate-intensity sports, fitness or recreational (leisure) activities that cause a small increase in breathing or heart rate such as brisk walking, <i>[cycling, swimming, volleyball]</i> for at least 10 minutes continuously?<br><i>[INSERT EXAMPLES] (USE SHOWCARD)</i>                                                      | Yes 1<br><br>No 2 <i>If No, go to P16</i>                       | P13          |
| In a typical week, on how many days do you do moderate-intensity sports, fitness or recreational (leisure) activities?                                                                                                                                                                                                                           | Number of days<br>_____                                         | P14          |
| How much time do you spend doing moderate-intensity sports, fitness or recreational (leisure) activities on a typical day?                                                                                                                                                                                                                       | Hours : minutes    _____ : _____<br>hrs                    mins | P15<br>(a-b) |
| <b>Sedentary behaviour</b>                                                                                                                                                                                                                                                                                                                       |                                                                 |              |
| The following question is about sitting or reclining at work, at home, getting to and from places, or with friends including time spent sitting at a desk, sitting with friends, traveling in car, bus, train, reading, playing cards or watching television, but do not include time spent sleeping.<br><i>[INSERT EXAMPLES] (USE SHOWCARD)</i> |                                                                 |              |
| How much time do you usually spend sitting or reclining on a typical day?                                                                                                                                                                                                                                                                        | Hours : minutes    _____ : _____<br>hrs                    mins | P16<br>(a-b) |

| Physical Activity                                                                                                                                                                                                                                                                                                                                                                                                                                                                                                                                                                                                                                                                                                                                                                                                                             |                                                                         |             |
|-----------------------------------------------------------------------------------------------------------------------------------------------------------------------------------------------------------------------------------------------------------------------------------------------------------------------------------------------------------------------------------------------------------------------------------------------------------------------------------------------------------------------------------------------------------------------------------------------------------------------------------------------------------------------------------------------------------------------------------------------------------------------------------------------------------------------------------------------|-------------------------------------------------------------------------|-------------|
| <p>Next I am going to ask you about the time you spend doing different types of physical activity in a typical week. Please answer these questions even if you do not consider yourself to be a physically active person.</p> <p>Think first about the time you spend doing work. Think of work as the things that you have to do such as paid or unpaid work, study/training, household chores, harvesting food/crops, fishing or hunting for food, seeking employment. <i>[insert other examples if needed]</i>. In answering the following questions 'vigorous-intensity activities' are activities that require hard physical effort and cause large increases in breathing or heart rate, 'moderate-intensity activities' are activities that require moderate physical effort and cause small increases in breathing or heart rate.</p> |                                                                         |             |
| Question                                                                                                                                                                                                                                                                                                                                                                                                                                                                                                                                                                                                                                                                                                                                                                                                                                      | Response                                                                | Code        |
| <b>Work</b>                                                                                                                                                                                                                                                                                                                                                                                                                                                                                                                                                                                                                                                                                                                                                                                                                                   |                                                                         |             |
| Does your work involve vigorous-intensity activity that causes large increases in breathing or heart rate like <i>[carrying or lifting heavy loads, digging or construction work]</i> for at least 10 minutes continuously?<br><i>[INSERT EXAMPLES] (USE SHOWCARD)</i>                                                                                                                                                                                                                                                                                                                                                                                                                                                                                                                                                                        | Yes 1<br>No 2 <i>If No, go to P 4</i>                                   | P1          |
| In a typical week, on how many days do you do vigorous-intensity activities as part of your work?                                                                                                                                                                                                                                                                                                                                                                                                                                                                                                                                                                                                                                                                                                                                             | Number of days <input type="text"/>                                     | P2          |
| How much time do you spend doing vigorous-intensity activities at work on a typical day?                                                                                                                                                                                                                                                                                                                                                                                                                                                                                                                                                                                                                                                                                                                                                      | Hours : minutes <input type="text"/> : <input type="text"/><br>hrs mins | P3<br>(a-b) |
| Does your work involve moderate-intensity activity, that causes small increases in breathing or heart rate such as brisk walking <i>[or carrying light loads]</i> for at least 10 minutes continuously?<br><i>[INSERT EXAMPLES] (USE SHOWCARD)</i>                                                                                                                                                                                                                                                                                                                                                                                                                                                                                                                                                                                            | Yes 1<br>No 2 <i>If No, go to P 7</i>                                   | P4          |
| In a typical week, on how many days do you do moderate-intensity activities as part of your work?                                                                                                                                                                                                                                                                                                                                                                                                                                                                                                                                                                                                                                                                                                                                             | Number of days <input type="text"/>                                     | P5          |
| How much time do you spend doing moderate-intensity activities at work on a typical day?                                                                                                                                                                                                                                                                                                                                                                                                                                                                                                                                                                                                                                                                                                                                                      | Hours : minutes <input type="text"/> : <input type="text"/><br>hrs mins | P6<br>(a-b) |
| <b>Travel to and from places</b>                                                                                                                                                                                                                                                                                                                                                                                                                                                                                                                                                                                                                                                                                                                                                                                                              |                                                                         |             |
| <p>The next questions exclude the physical activities at work that you have already mentioned.</p> <p>Now I would like to ask you about the usual way you travel to and from places. For example to work, for shopping, to market, to place of worship. <i>[insert other examples if needed]</i></p>                                                                                                                                                                                                                                                                                                                                                                                                                                                                                                                                          |                                                                         |             |
| Do you walk or use a bicycle ( <i>pedal cycle</i> ) for at least 10 minutes continuously to get to and from places?                                                                                                                                                                                                                                                                                                                                                                                                                                                                                                                                                                                                                                                                                                                           | Yes 1<br>No 2 <i>If No, go to P 10</i>                                  | P7          |
| In a typical week, on how many days do you walk or bicycle for at least 10 minutes continuously to get to and from places?                                                                                                                                                                                                                                                                                                                                                                                                                                                                                                                                                                                                                                                                                                                    | Number of days <input type="text"/>                                     | P8          |
| How much time do you spend walking or bicycling for travel on a typical day?                                                                                                                                                                                                                                                                                                                                                                                                                                                                                                                                                                                                                                                                                                                                                                  | Hours : minutes <input type="text"/> : <input type="text"/><br>hrs mins | P9<br>(a-b) |

**Table S3.** Stratification of Baseline Data by Survey Completion at Year 1.

|                                   | <b>AD (n = 36)</b> | <b>Non-AD (n = 52)</b> | <b>ANOVA p-value</b> |
|-----------------------------------|--------------------|------------------------|----------------------|
| <b>BMI</b>                        | 27.6 (SD = 5.08)   | 31.0 (SD = 8.35)       | 0.416                |
| Completed T1                      | 27.5 (SD = 4.86)   | 31.8 (SD = 8.99)       |                      |
| Did not complete T1               | 27.4 (SD = 5.63)   | 29.6 (SD = 6.83)       |                      |
| <b>WHR</b>                        | 0.84 (SD = 0.09)   | 0.87 (SD = 0.10)       | 0.301                |
| Completed T1                      | 0.82 (SD = 0.08)   | 0.86 (SD = 0.09)       |                      |
| Did not complete T1               | 0.85 (SD = 0.10)   | 0.88 (SD = 0.12)       |                      |
| <b>Age</b>                        | 34.9 (SD = 14.50)  | 41.8 (SD = 13.20)      | 0.588                |
| Completed T1                      | 35.1 (SD = 12.21)  | 42.3 (SD = 10.61)      |                      |
| Did not complete T1               | 34.8 (SD = 17.90)  | 40.6 (SD = 18.27)      |                      |
| <b>Gender (% Men)</b>             | 19.4% (n = 7)      | 23.1% (n = 12)         |                      |
| <b>Work vigorous activity (%)</b> | 31.4% (n = 11)     | 28.6% (n = 14)         |                      |
| <b>Mean min per week</b>          | 513 (SD = 1126.7)  | 467 (SD = 995.7)       | 0.257                |
| Completed T1                      | 424 (SD = 1164.5)  | 373 (SD = 715.2)       |                      |
| Did not complete T1               | 651 (SD = 1092.5)  | 680 (SD = 1457.3)      |                      |
| <b>Work moderate activity (%)</b> | 65.7% (n = 23)     | 44.9% (n = 22)         |                      |
| <b>Mean min per week</b>          | 887 (SD = 1065.6)  | 749 (SD = 1136.7)      | 0.182                |
| Completed T1                      | 891 (SD = 1141.6)  | 564 (SD = 890.9)       |                      |
| Did not complete T1               | 882 (SD = 967.9)   | 1168 (SD = 1513.8)     |                      |
| <b>Walk/cycle for travel (%)</b>  | 88.5% (n = 31)     | 77.6% (n = 38)         |                      |
| <b>Mean min per week</b>          | 717 (SD = 843.9)   | 450 (SD = 1097.8)      | 0.852                |
| Completed T1                      | 643 (SD = 883.8)   | 533 (SD = 1297.3)      |                      |
| Did not complete T1               | 843 (SD = 789.7)   | 263 (SD = 332.3)       |                      |
| <b>Vigorous rec activity (%)</b>  | 54.2% (n = 19)     | 33.3% (n = 6)          |                      |
| <b>Mean min per week</b>          | 202 (SD = 312.8)   | 113 (SD = 241.9)       | 0.401                |
| Completed T1                      | 138 (SD = 211.0)   | 129 (SD = 274.4)       |                      |
| Did not complete T1               | 312 (SD = 422.8)   | 78 (SD = 149.5)        |                      |
| <b>Moderate rec activity (%)</b>  | 50% (n = 18)       | 43.7% (n = 21)         |                      |
| <b>Mean min per week</b>          | 218 (SD = 410.2)   | 102 (SD = 195.7)       | 0.857                |
| Completed T1                      | 254 (SD = 479.4)   | 90 (SD = 170.9)        |                      |
| Did not complete T1               | 157 (SD = 261.0)   | 130 (SD = 246.3)       |                      |
| <b>Daily sitting time (min)</b>   | 272 (SD = 203.8)   | 245 (SD = 196.2)       | 0.956                |
| Completed T1                      | 299 (SD = 222.8)   | 225 (SD = 153.0)       |                      |
| Did not complete T1               | 227 (SD = 165.4)   | 283 (SD = 270.7)       |                      |
| <b>Steps per day</b>              | 4573 (SD = 3038.7) | 5388 (SD = 3378.3)     | 0.018                |
| Completed T1                      | 3792 (SD = 3175.2) | 4404 (SD = 2972.3)     |                      |
| Did not complete T1               | 6524 (SD = 1631.5) | 9327 (SD = 1448.9)     |                      |
| <b>Stair flights per day</b>      | 5.0 (SD = 2.6)     | 9.4 (SD = 5.3)         | 0.014                |
| Completed T1                      | 4.2 (SD = 2.5)     | 7.5 (SD = 3.9)         |                      |
| Did not complete T1               | 7.3 (SD = 1.5)     | 17 (SD = 1.4)          |                      |
